# Supplementary material for: Stoichiometrically-controlled reactivity and supramolecular storage of butylmagnesiate anions
Source: Royal Society of Chemistry journal article supplement (doi:10.1039/b416636a), 2005-01-01
Supplement: b416636a.doc [file b416636a.doc]

Stoichiometrically-controlled reactivity and supramolecular storage of butylmagnesiate anions

Prokopis C. Andrikopoulos, David R. Armstrong, Eva Hevia,* Alan R. Kennedy, Robert E. Mulvey* and Charles T. O’Hara

**Experimental Section**

**General Methods.** 1H and 13C NMR spectra were recorded on a Bruker DPX 400 MHz spectrometer. All 13C NMR spectra were proton decoupled. Toluene, THF and hexane were distilled from sodium-benzophenone. n,s-Dibutylmagnesium in heptane (Aldrich) was standardised immediately prior to use using salicylaldehyde phenylhydrazone.[[1]](#footnote-2) The synthesis of butylsodium was as previously published.[[2]](#footnote-3) All synthetic work was carried out under an inert argon atmosphere.

**Synthesis of NaMgBu3 (1)** BuNa (0.08 g, 1 mmol) was suspended in hexane to which Bu2Mg (1 mL of a 1M solution in heptane, 1 mmol) was added. A white solid precipitated. The mixture was stirred at room temperature for 15 mins and volatiles were removed under vacuum. The solid residue was characterized by NMR spectroscopy. 1H NMR (400 MHz, 25oC, d8-toluene): 1.97-1.34 (m, broad, distinct resonances at 1.63, 1.53 and 1.42), 1.33-1.05 (m, broad, distinct resonances at 1.10 and 1.08), -0.12-(-1.06) (m, broad, main resonance at -0.52). 13C{1H} NMR (100.63 MHz, 25oC, d8-toluene): 32.01, 31.88 (broad), 30.42, 30.38, 14.43, 14.23, 9.93 (broad, M-*C*H2).

**Synthesis of Na2MgBu4 (2)** BuNa (0.16 g, 2 mmol) was suspended in hexane and Bu2Mg (1 mL of a 1M solution in heptane, 1 mmol) was then added. A white solid precipitated. The mixture was stirred at room temperature for 15 mins and volatiles were removed under vacuum. The solid residue was characterized by NMR spectroscopy. 1H NMR (400 MHz, 25oC, d8-toluene): 1.88-1.42 (m, broad, distinct resonance at 1.52), 1.33-0.94 (m, broad, distinct resonances at 1.09 and 1.08), -0.26-(-0.98) (m, broad, distinct resonance at -0.45 and -0.73). 13C{1H} NMR (100.63 MHz, 25oC, d8-toluene): 32.36 (broad), 32.01 (broad), 30.49, 30.40, 14.43, 14.28, 11.08, 9.91 (broad, M-*C*H2).

**BuNa NMR analysis.** A NMR tube was charged in the glove box with 0.08 g of BuNa. 0.5 mL of deuterated benzene were added and a few drops of deuterated THF to help to dissolve all of the solid. 1H and 13C NMR spectra were recorded. 1H NMR (400.13MHz, 293K, d6-benzene): 2.06 (m, 2H, C*H*2), 1.77 (m, 2H, C*H*2), 1.25 (t, 3H, C*H*3), -0.45 (m, 2H, Na-C*H*2). 13C{H} NMR (100.63MHz, 293K, d6-benzene): 37.19 (*C*H2),35.17 (*C*H2), 14.82 (*C*H3), 9.56 (Na-*C*H2).

***n,*s-Bu2Mg NMR analysis.** 0.5 mL of a 1M commercial solution of Bu2Mg in heptane were placed in a Schlenk tube and the solvent was removed under vacuum. The solid residue was then redissolved in deuterated benzene (0.6 mL). 1H and 13C NMR spectra were recorded.[[3]](#footnote-4) 1H NMR (400.13MHz, 293K, d6-benzene): 3.73 (m, OC*H*2, OC*H*), 3.42 1.68-0.68 (m, broad, CH2’s, CH3’s aliphatics), 0.54-(-0.3) (m, broad, Mg-C*H*2), -0.68 (m, broad, Mg-C*H*). 13C{H} NMR (100.63MHz, 293K, d6-benzene): 64.6 (O*C*H2, O*C*H), 38.0, 37.6, 31.2, 29.4, 29.1, 20.2, 19.6, 14.2, 14.1, 13.9, (*C*H2’s, *C*H3’s aliphatics), 9.6, 9.4 (Mg-*C*H2, Mg-*C*H).

**Synthesis of [{[Na2(DABCO)3 (toluene)]2+ (MgBu4)2-}] (3)** BuNa (0.4 g, 5 mmol) was suspended in hexane (10 mL). Then Bu2Mg (5 mL of a 1M solution in heptane, 5 mmol) was added to produce a white precipitate. A solution of DABCO (0.84 g, 7.5 mmol) in toluene (2 mL) was then introduced. The mixture was stirred at room temperature for 15 mins affording a pale yellow suspension. THF (ca 2 mL) was added until all of the solid dissolved. Placed in the freezer at -28°C, the resulting solution deposited yellow crystals (yield of first batch, 0.32 g, 18%).1H NMR (400 MHz, 25°C, d8-THF): 7.17-7.06 (m, 5H, C6*H*5, toluene), 2.64 (s, 36H, C*H*2, DABCO), 2.27 (s, 3H,C*H*3, toluene), 1.34 [(m (broad), 8H, C*H*2, Bu], 1.19 (m, 8H, C*H*2, Bu), 0.80 (t, 12H, C*H*3, Bu), -0.46 [m (broad), 8H, Mg-C*H*2, Bu]. 13C{1H} NMR (100.63 MHz, 25oC, d8-THF): 128.75, 128.02, 125.12, 122.47 (*C*6H5, toluene), 47.54 (*C*H2, DABCO), 31.56 (C*H*2, Bu), 30.25 (broad, C*H*2, Bu), 23.41 (*C*H3, toluene), 14.09 (C*H*3, Bu), Mg-*C*H2 signal not detected.

**Synthesis of [DABCO.NaCH2Ph] (4).** BuNa (0.8 g, 10 mmol) was suspended in hexane (10 mL). Then Bu2Mg (5 mL of a 1M solution in heptane, 5 mmol) was added to produce a white precipitate. A solution of DABCO (0.84 g, 7.5 mmol) in toluene (2 mL) was next introduced. The mixture was stirred at room temperature for 15 mins affording an orange suspension. THF (ca 1 mL) was added until all the solid dissolved. Placed in the freezer at -28°C, the resulting solution deposited an orange microcrystalline solid (yield of first batch, 0.21 g, 35%).1H NMR (400 MHz, 25°C, d8-THF): 6.15 (m, 2H, *Hmeta*, Ph), 5.86 (m, 2H, *Hortho*, Ph), 5.03 (m, 1H, *Hpara*, Ph), 2.64 (s, 12H, C*H*2, DABCO), 1.91 (s, 2H,C*H*2). 13C{1H} NMR (100.63 MHz, 25oC, d8-THF): 157.22 (Cipso, Ph), 129.69, 113.38 (*Cortho* and *Cmeta*, Ph), 100.38 (*Cpara*, Ph), 48.08 (*C*H2, DABCO), 41.05 (*C*H2).

When the orange precipitate obtained after the addition of a solution of DABCO in toluene to the suspension of Na2MgBu4 in hexane is isolated the 1H NMR spectrum shows a mixture of compounds **3** and **4**, in the expected ratio of 2:1.[[4]](#footnote-5)

**Alternative synthesis of 4.** BuNa (0.4 g, 5 mmol) was suspended in hexane (10 mL). Then DABCO (0.56 g, 5 mmol) was introduced. Toluene (2 mL) was added to the white suspension which changed colour instantaneously to orange. The solid was isolated by filtration and washed with hexane (2  5 mL), (0.92 g, 81%). This solid gave the same analysis as the previous sample.

| **Molecule** | **HF/6-31G*** | **Zero Point**  **Energy** | **B3LYP/6-311G**** | **B3LYP/6-311G** corrected** |
| --- | --- | --- | --- | --- |
| NaBu | -318.497763 | 0.127203 | -320.158329 | -320.042574 |
| (NaBu)2 | -637.046781 | 0.254223 | -640.355488 | -640.124145 |
| MgBu2 | -512.986508 | 0.257580 | -515.869209 | -515.634811 |
| (MgBu2)2 | -1026.002028 | 0.516505 | -1031.764925 | -1031.294905 |
| Na2MgBu4 | -1150.081281 | 0.512954 | -1156.265074 | -1155.798286 |
| NaMgBu3 (1) | -831.537420 | 0.385440 | -836.069762 | -835.719012 |
| NaMgBu3 (2) | -831.537340 | 0.385441 | -836.069561 | -835.718810 |
| (NaMgBu3)2 Ci | -1663.101763 | 0.772810 | -1672.165675 | -1671.462418 |
| (NaMgBu3)2 C2 | -1663.102170 | 0.772828 | -1672.165899 | -1671.462626 |

2 NaBu → (NaBu)2 -24.47 kcal mol-1

2 MgBu2 → (MgBu2)2 -15.86 kcal mol-1

NaBu + MgBu2  → NaMgBu3

(1) -26.12 kcal mol-1 (on dimerization this goes to the Ci model)

(2) -25.99 kcal mol-1 (on dimerization this goes to the C2 model)

2 NaMgBu3 → (NaMgBu3)2

Ci -15.31 kcal mol-1

C2 -15.69 kcal mol-1

2 NaBu + MgBu2 → Na2MgBu4 -49.15 kcal mol-1

(NaBu)2 + (MgBu2)2 → (NaMgBu3)2 -27.34 kcal mol-1

(NaBu)2 + ½ (MgBu2)2 → Na2MgBu4 -16.74 kcal mol-1

**NaBu**


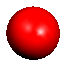

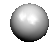

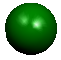

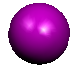


Magnesium

Sodium

Carbon

Hydrogen


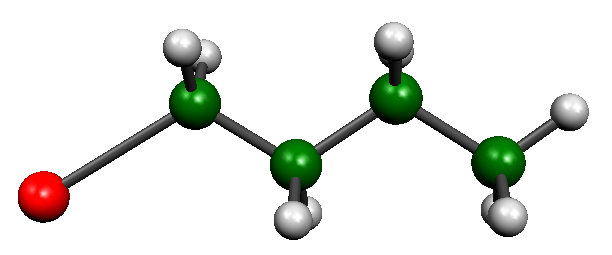

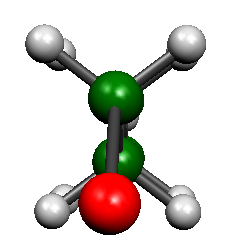


Na-C 2.345Å

Na-C-C 116.5°

**(NaBu)2 Ci**


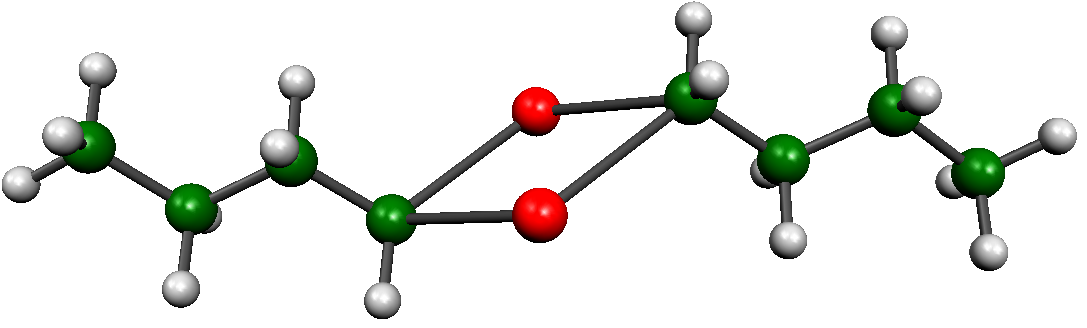

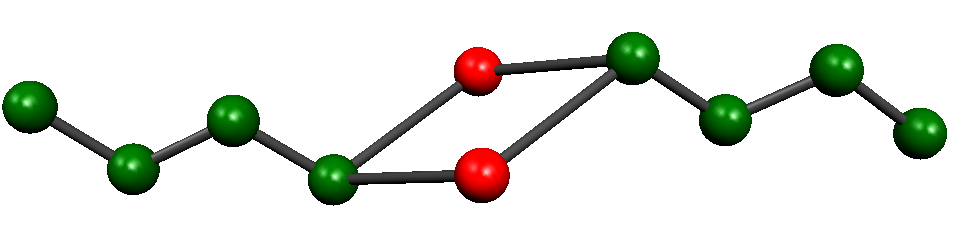

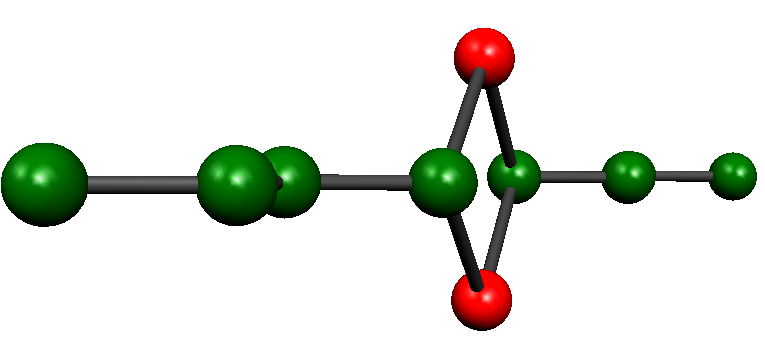

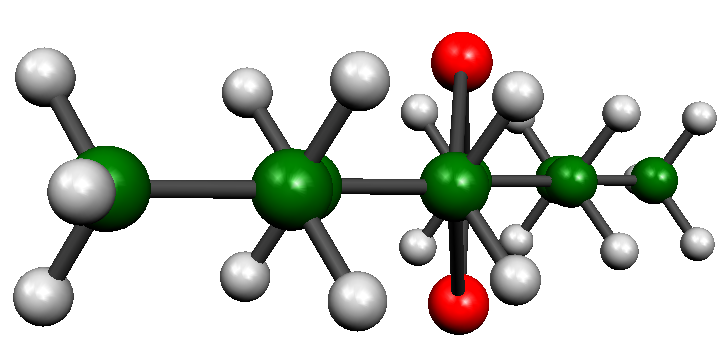


Na-Na 2.669Å

Na-C 2.509Å

C-Na-C 115.7°

Na-C-Na 64.3°

**MgBu2 (C2)**


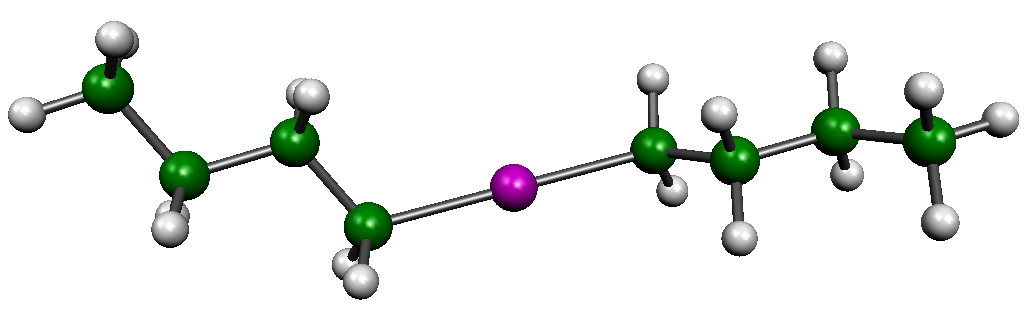

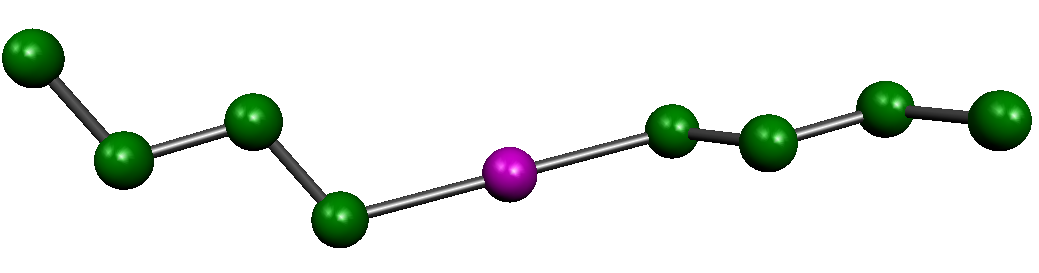

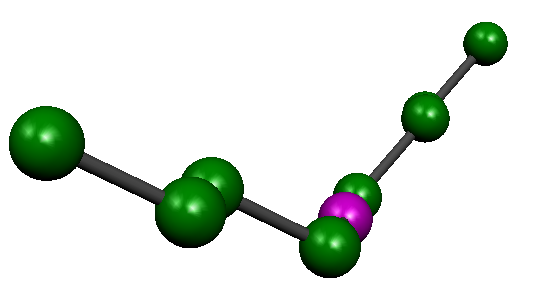

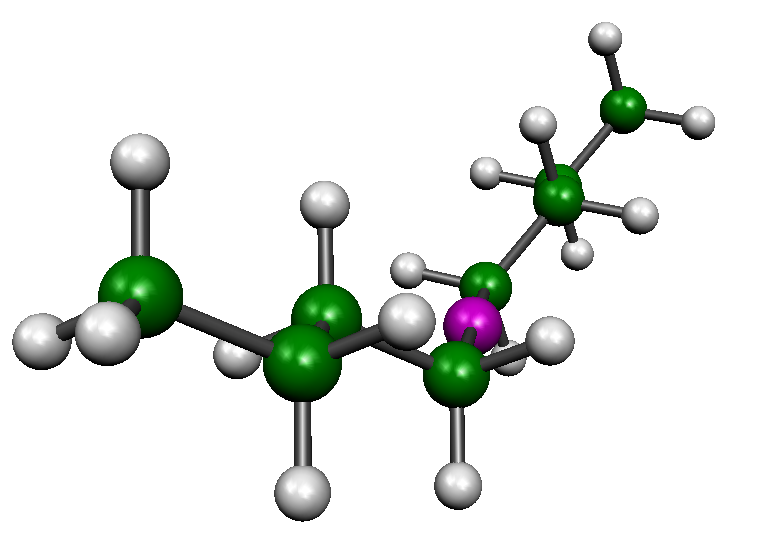


Mg-C 2.120Å

C-Mg-C 180°

**(MgBu2)2**


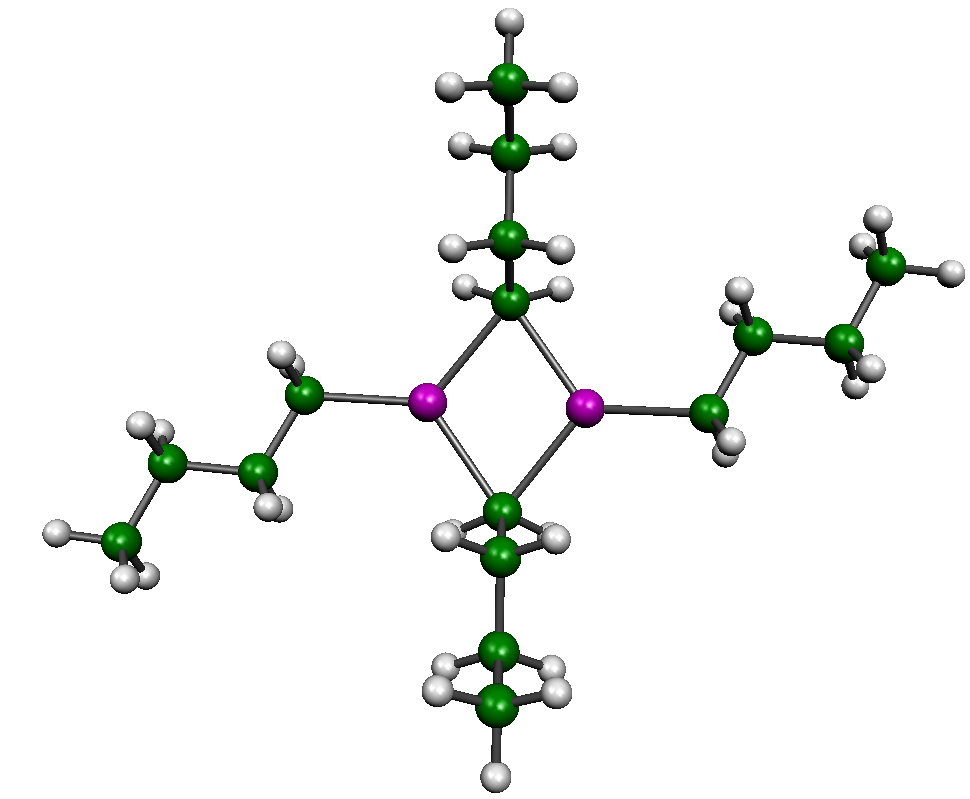

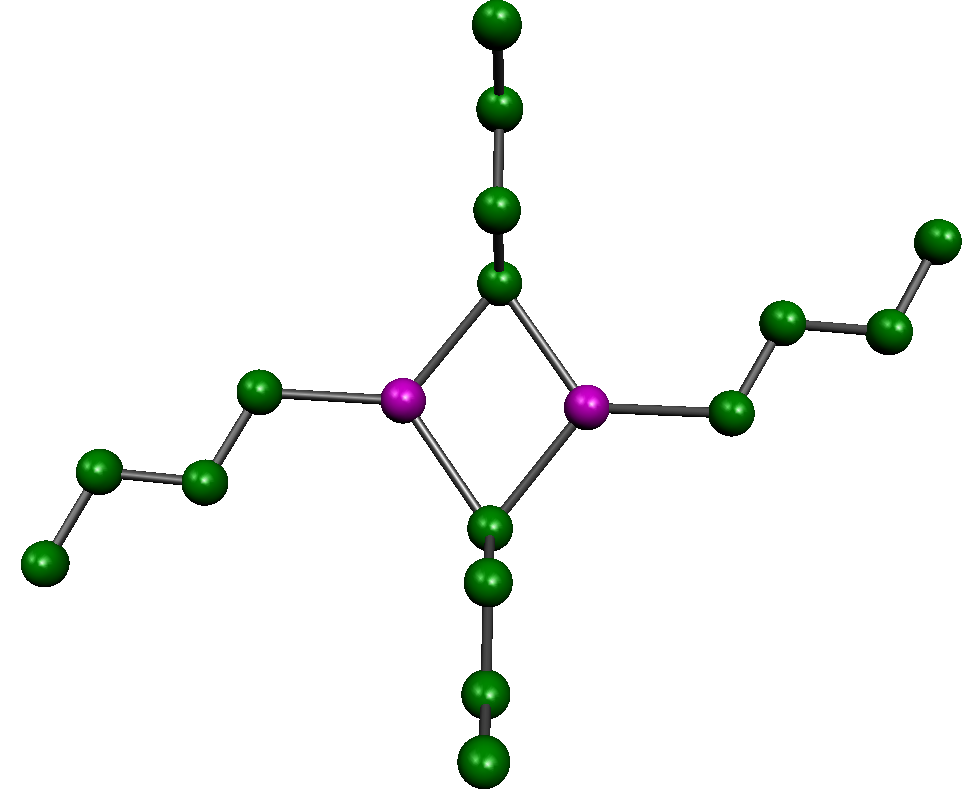

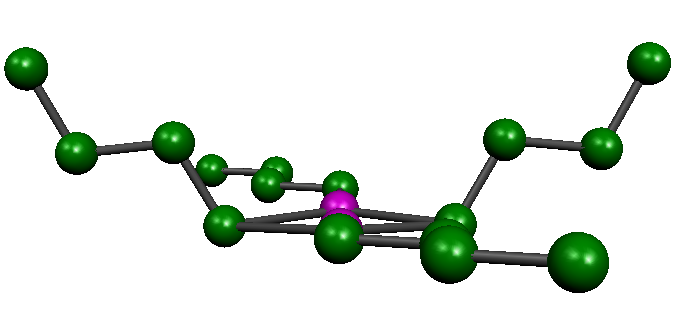

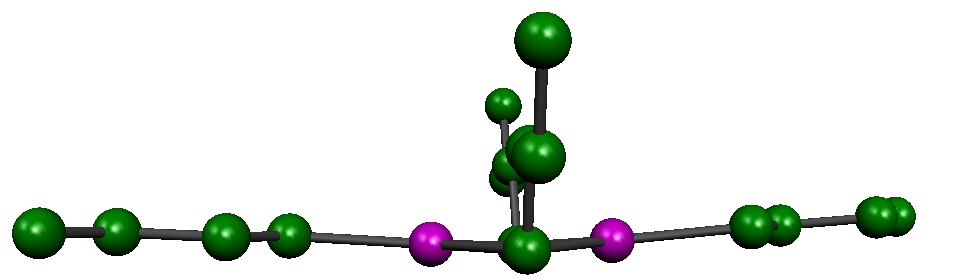


**
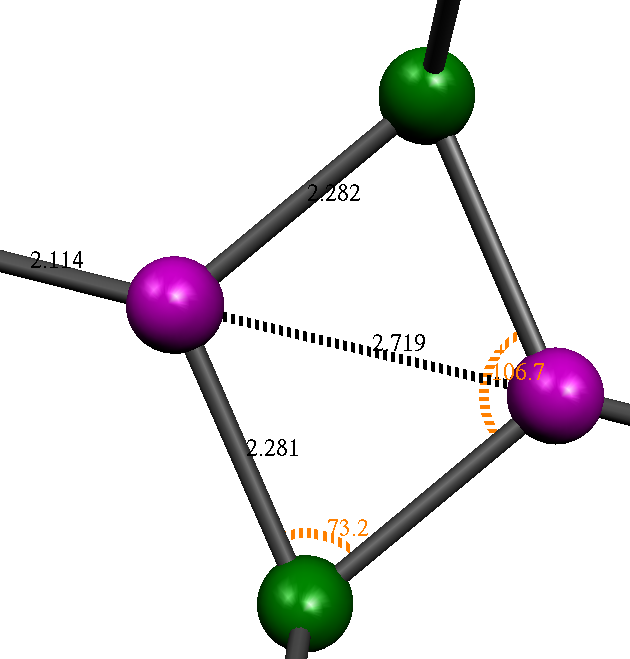
**

Mg-Mg 2.719Å

Mg-C (butyl) 2.114Å

Mg-C(1) 2.281Å

Mg-C(2) 2.282Å

Mg-C-Mg 73.2°

C-Mg-C 106.7°

**Na2MgBu4 (S4)**


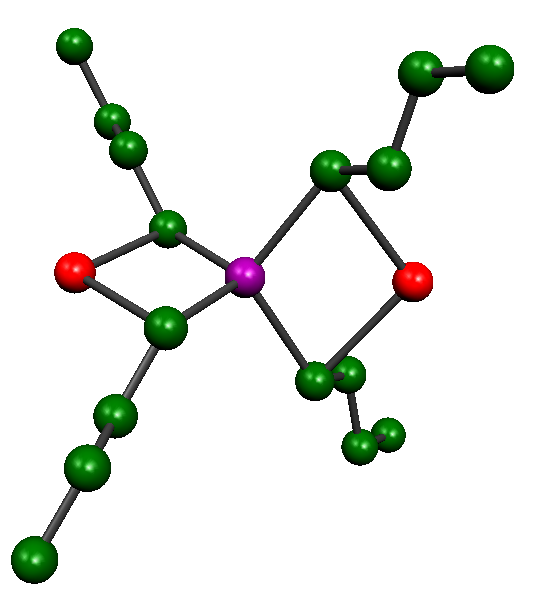

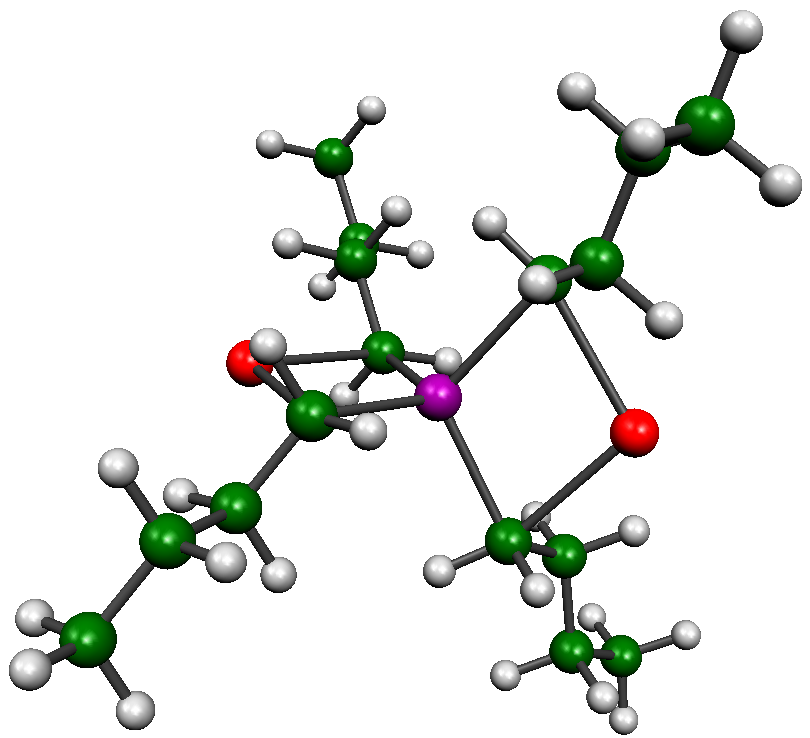

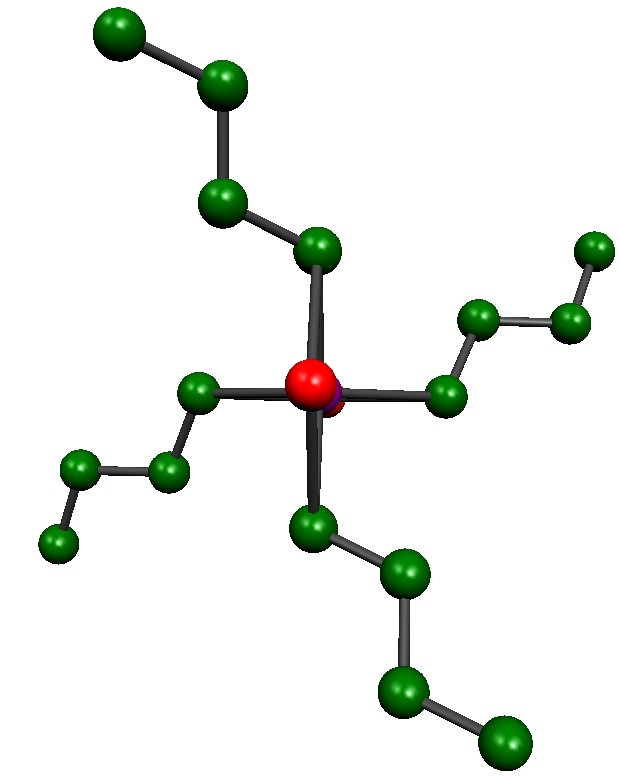

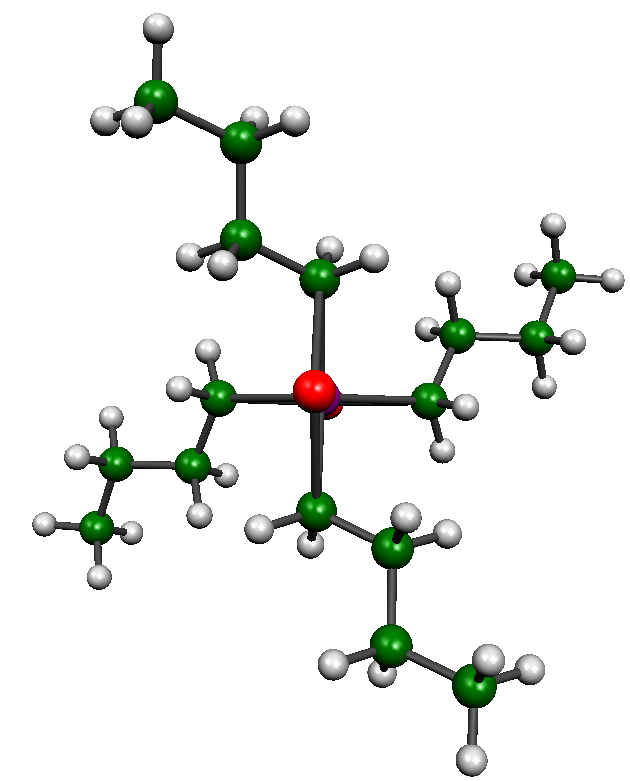


**
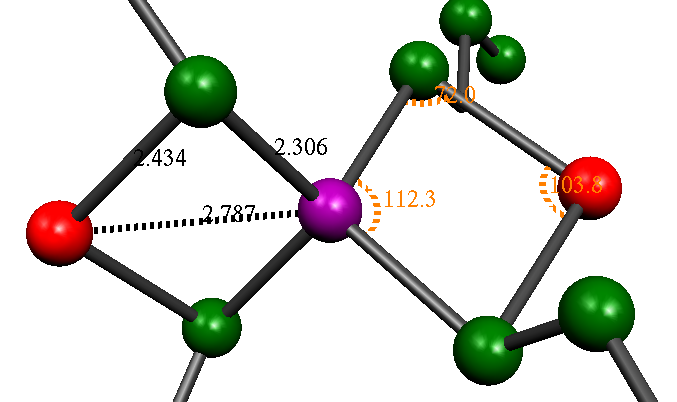
**

Na-Mg 2.787Å

Na-C 2.434Å

C-Mg 2.306Å

C-Mg-C 112.3°

Mg-C-Na 72.0°

C-Na-C 103.8°

**(NaMgBu3)2 (Ci)**


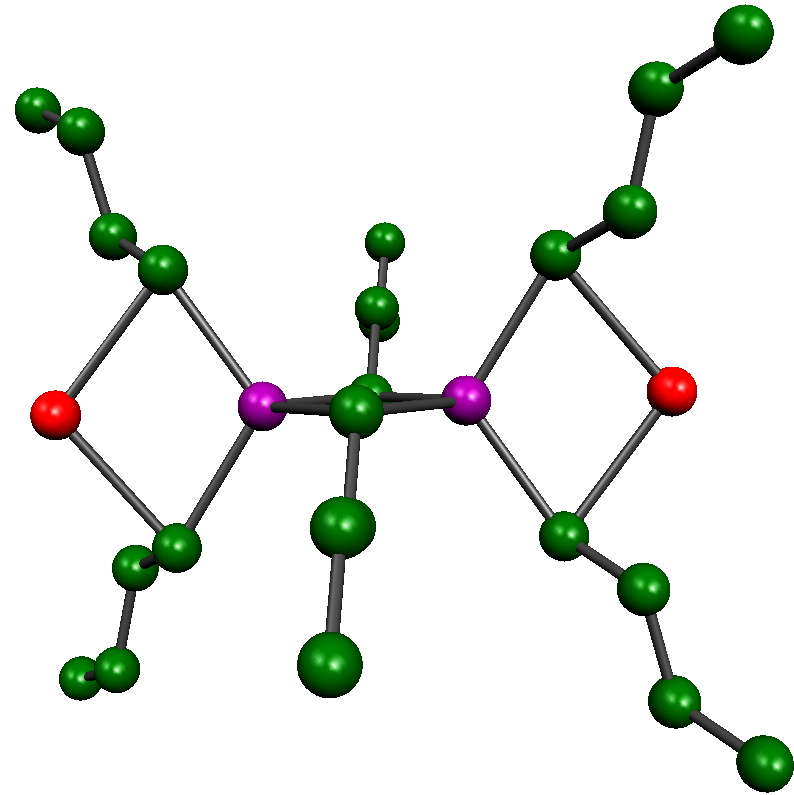

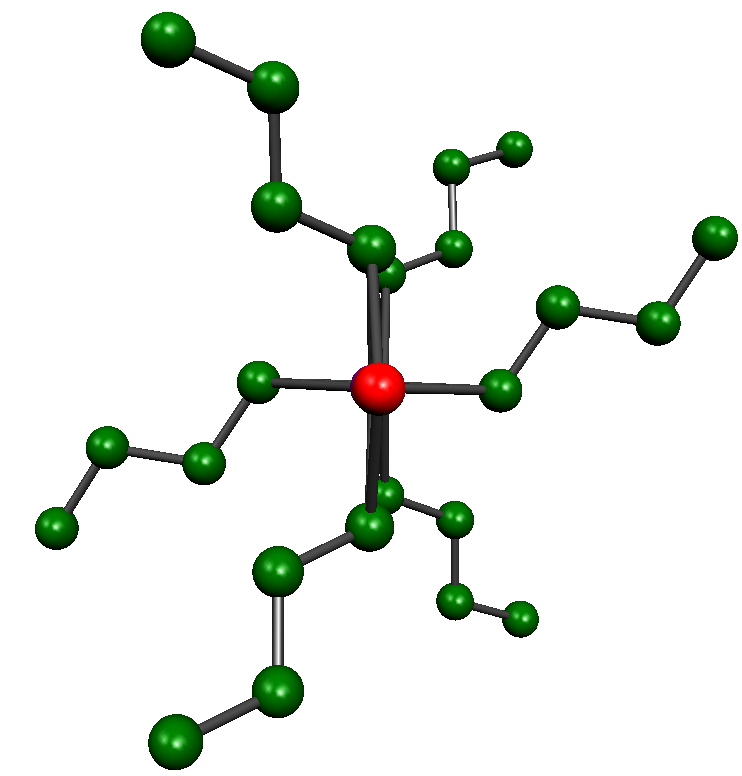

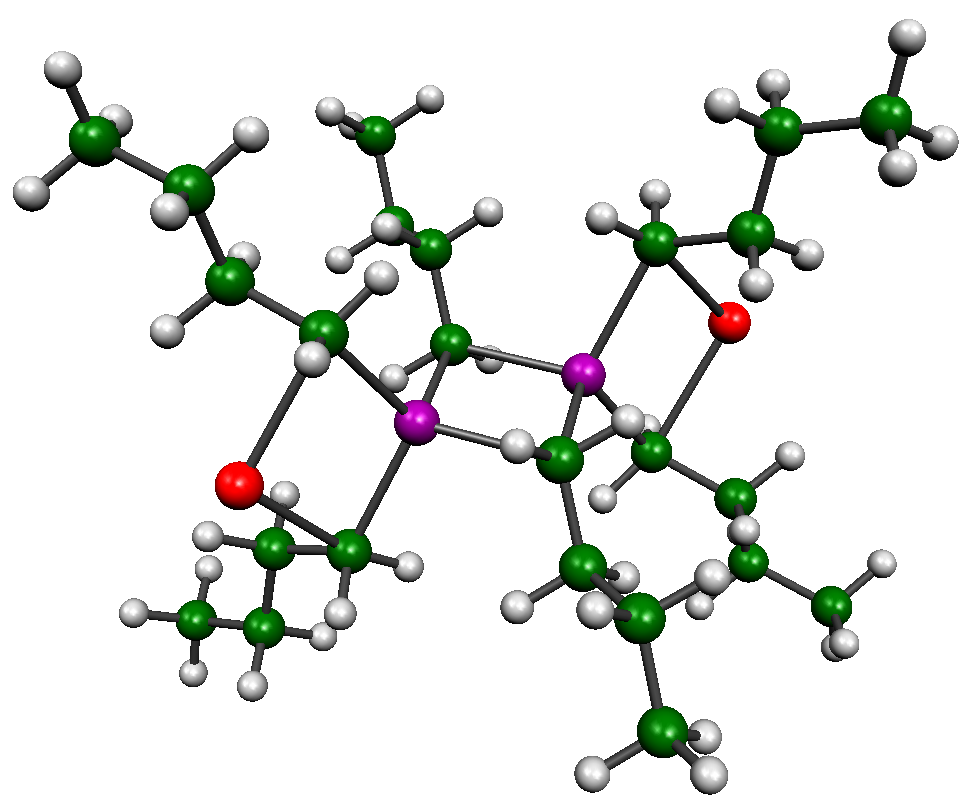

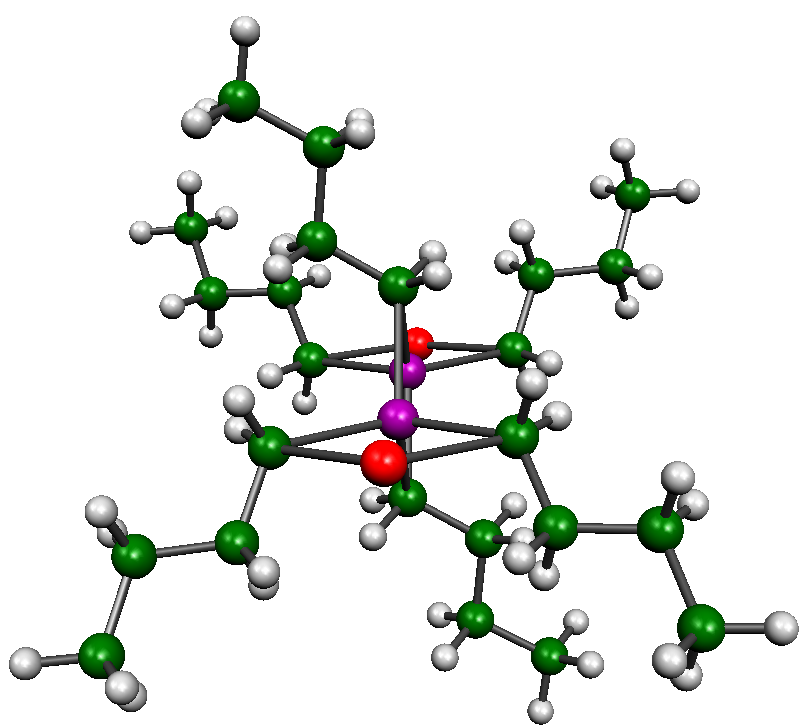


Na-Mg 2.794Å

Mg-Mg 2.758Å


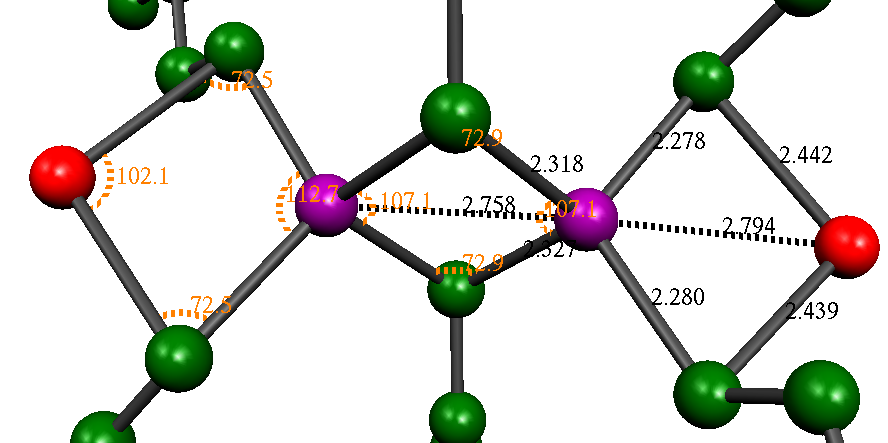


1

2

3

4

Na-C(1) 2.442Å

Na-C(2) 2.439Å

C(1)-Mg 2.278Å

C(2)-Mg 2.280Å

Mg-C(3) 2.318Å

Mg-C(4) 2.327Å

C(1)-Na-C(2) 102.1°

Na-C(1,2)-Mg 72.5°

C(1)-Mg-C(2) 112.7°

C(3,4)-Mg-C(4,3) 107.1°

Mg-C(3)-Mg 72.0°

Mg-C(4)-Mg 72.9°

**(NaMgBu3)2 (C2)**


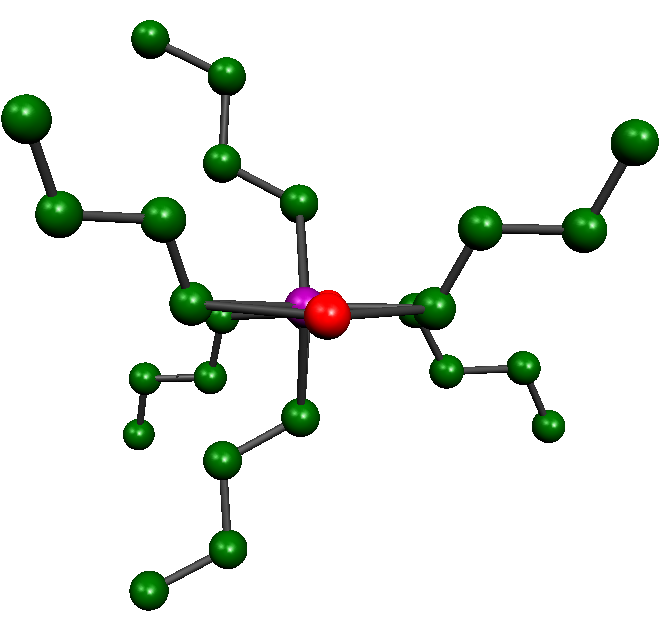

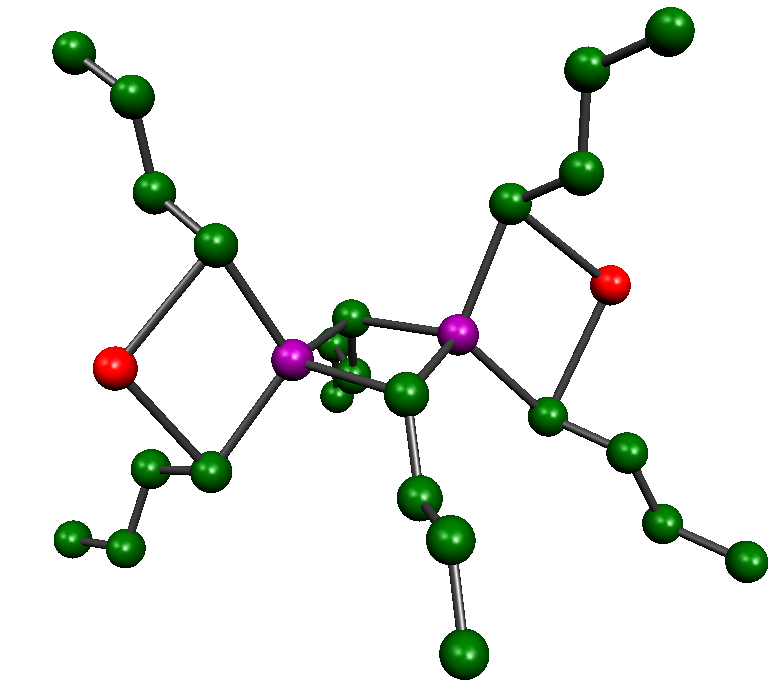

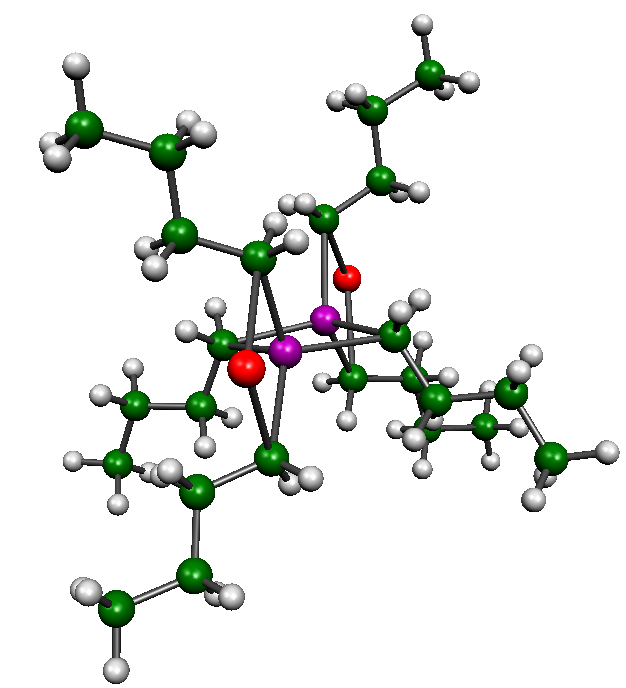

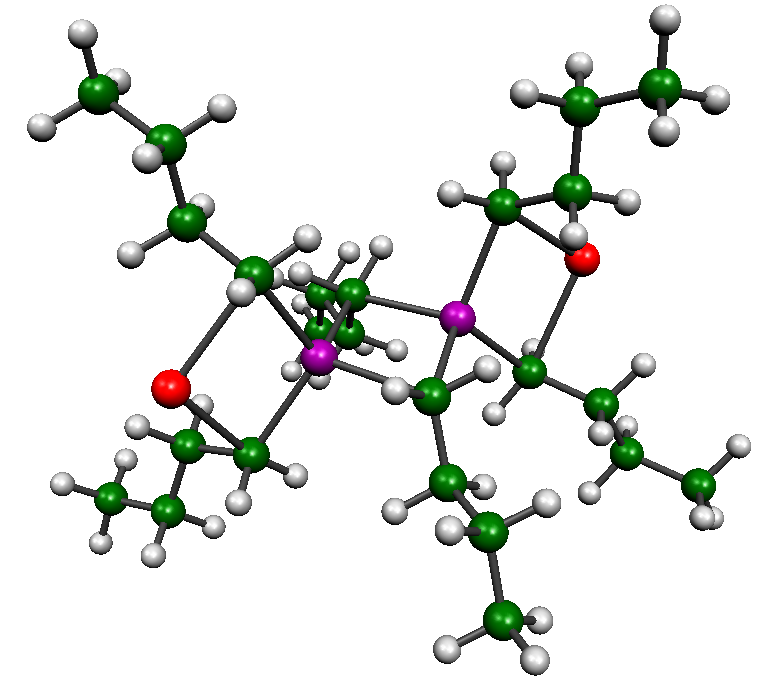

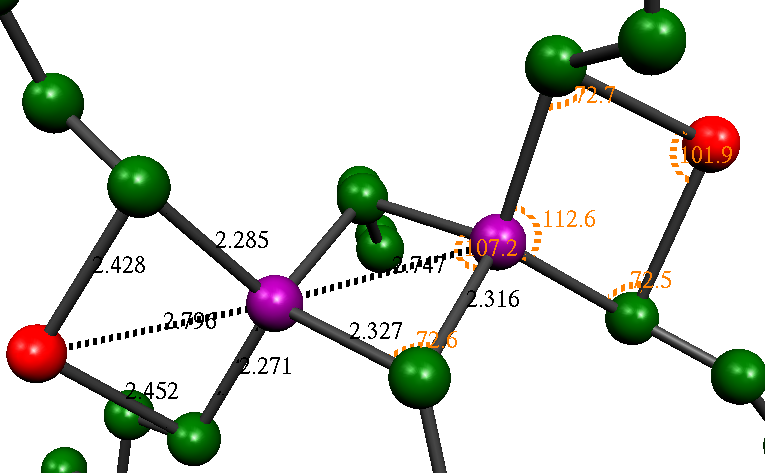


1

2

3

4

Na-Mg 2.796Å Na-C(2)-Mg 72.5°

Mg-Mg 2.747Å C(1)-Mg-C(2) 112.6°

Na-C(1) 2.428Å C(3,4)-Mg-C(4,3) 107.2°

Na-C(2) 2.452Å Mg-C(3,4)-Mg 72.5°

C(1)-Mg 2.285Å

C(2)-Mg 2.271Å

Mg-C(3) 2.316Å

Mg-C(4) 2.327Å

C(1)-Na-C(2) 101.9°

Na-C(1)-Mg 72.7°

**NaMgBu3 (1)**


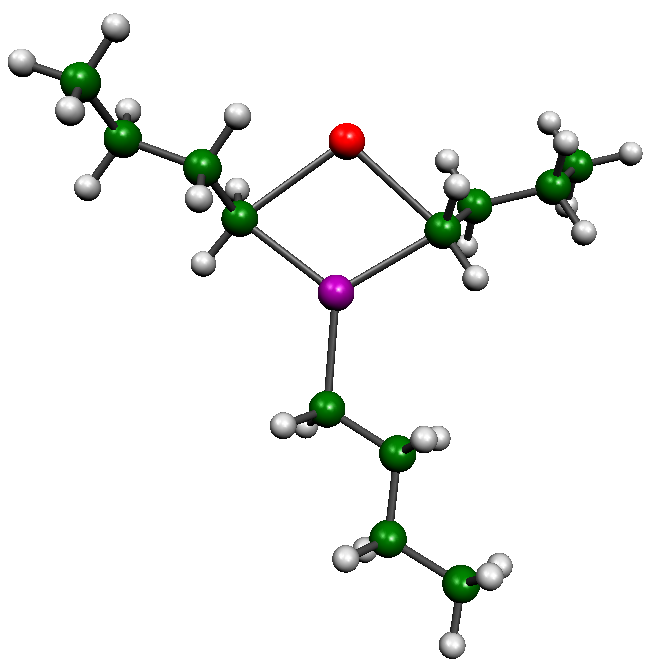

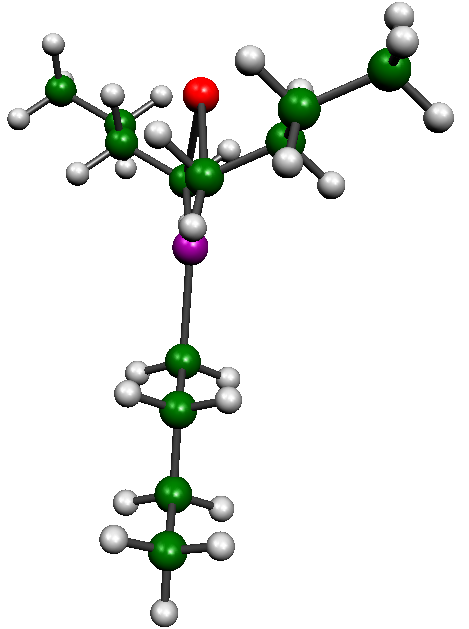

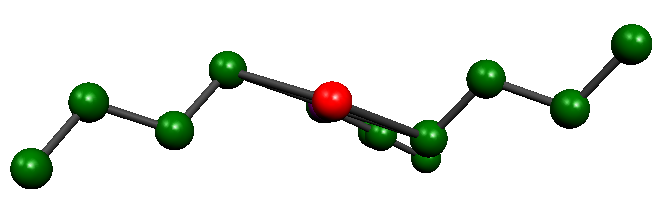

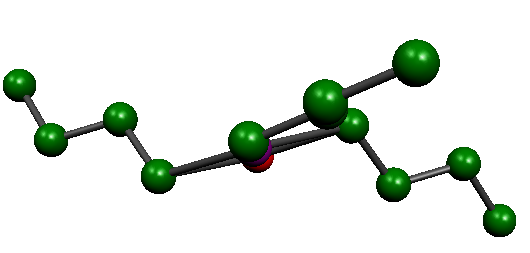

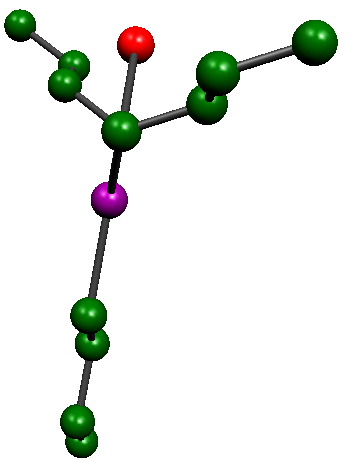


Na-C(1) 2.443Å


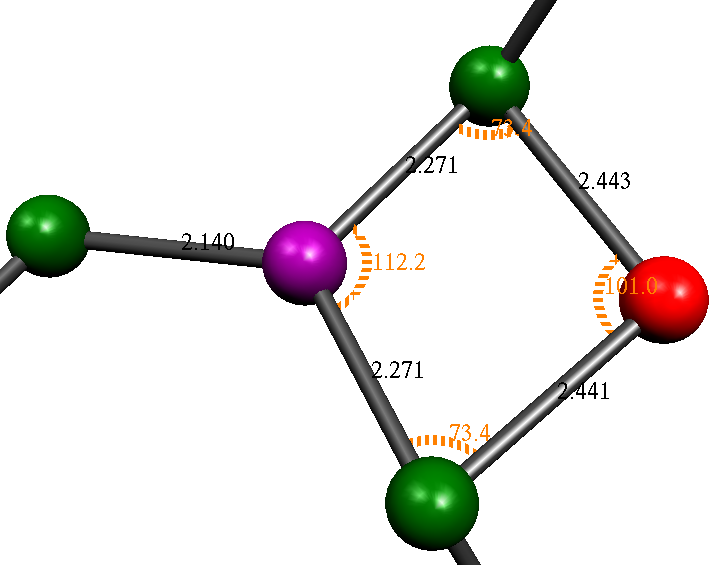


1

2

3

Na-C(2) 2.441Å

Mg-C(1) 2.271Å

Mg-C(2) 2.271Å

Mg-C(3) 2.140Å

Na-Mg 2.820Å

C(1)-Na-C(2) 101.0º

Na-C(2)-Mg 73.4º

C(2)-Mg-C(1) 112.2º

Mg-C(1)-Na 73.4º

**NaMgBu3 (2)**


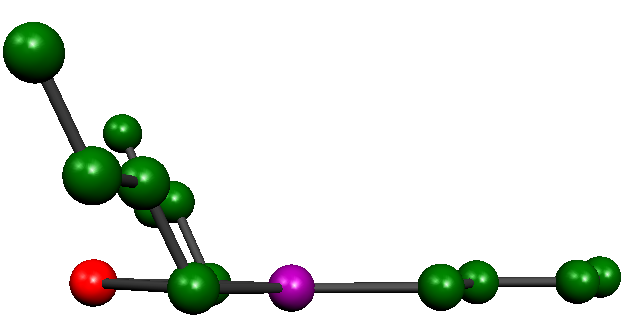

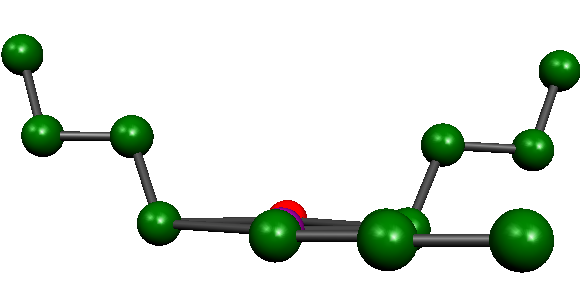

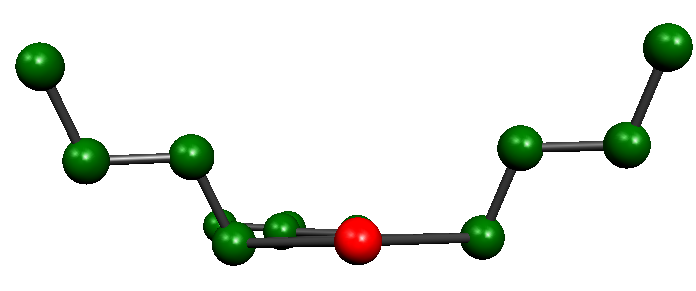

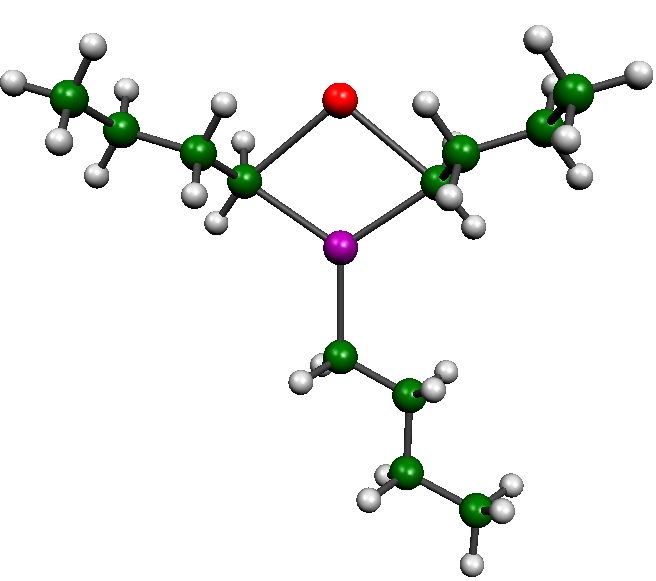

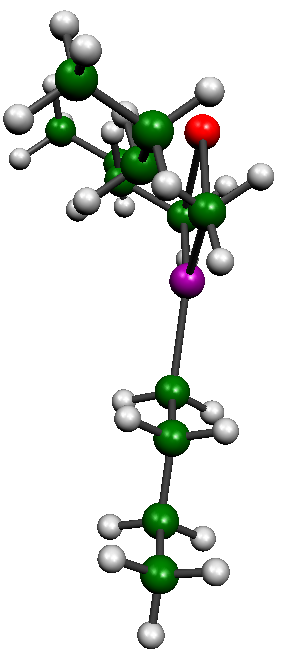

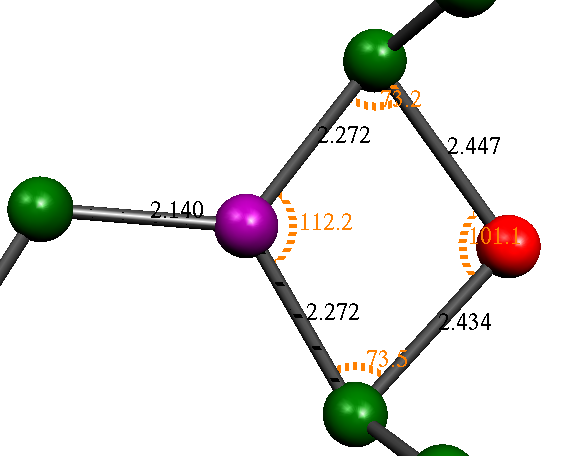


1

2

3

Na-C(1) 2.447Å

Na-C(2) 2.434Å

Mg-C(1) 2.272Å

Mg-C(2) 2.272Å

Mg-C(3) 2.140Å

Na-Mg 2.818Å

C(1)-Na-C(2) 101.1º

Na-C(2)-Mg 73.5º

C(2)-Mg-C(1) 112.2º

Mg-C(1)-Na 73,2º

**Computational Details**

The geometry of the molecules was optimized using Gaussian 03[[5]](#footnote-6) Exploratory *ab initio* calculations at the Hartree Fock (HF) level were performed, utilising the 6-31g* basis set[[6]](#footnote-7) . The resultant optimised geometries were subject to a frequency analysis and the refined by further density functional theory (DFT) calculations[[7]](#endnote-2) using the B3LYP functionals[[8]](#footnote-8),[[9]](#footnote-9) and the 6-311G** basis set[[10]](#footnote-10),[[11]](#footnote-11). The geometrical structural features from the DFT calculations are reported here while the total energy value from the DFT calculation is adjusted by including the zero-point energy abstracted from the HF calculation modified by the factor 0.91.

1. - Love, B. E.; Jones, E. G. *J. Org. Chem.* **1999**, *64*, 3755. [↑](#footnote-ref-2)
2. - Schade, C.; Bauer, W.; Schleyer, P. v. R. *J. Organomet. Chem.* **1985**, *295*, C25. [↑](#footnote-ref-3)
3. -Adventitious amounts of butoxide have been found in commercial Bu2Mg solutions, see: P. C. Andrikopoulos, D. R. Armstrong, W. Clegg, C. J. Gilfillan, E. Hevia, A. R. Kennedy, R. E. Mulvey, C. T. O’Hara, J. A. Parkinson, D. M. Tooke, *J. Am. Chem. Soc.* **2004**, *126*, 11612. [↑](#footnote-ref-4)
4. -Another unidentified species is observed, with the following resonances: 1.53 (m, *CH2*), 1.22 (m, C*H*2), 0.81 (t, C*H*3), -0.83 (m,broad, M-C*H*2). This compound is likely to be a complex of Bu2Mg with DABCO. [↑](#footnote-ref-5)
5. -Gaussian 03, Revision B.0.5, M. J. Frisch, G. W. Trucks, H. B. Schlegel, G. E. Scuseria, M. A. Robb, J. R. Cheeseman, J. A. Montgomery, Jr., T. Vreven, K. N. Kudin, J. C. Burant, J. M. Millam, S. S. Iyengar, J. Tomasi, V. Barone, B. Mennucci, M. Cossi, G. Scalmani, N. Rega, G. A. Petersson, H. Nakatsuji, M. Hada, M. Ehara, K. Toyota, R. Fukuda, J. Hasegawa, M. Ishida, T. Nakajima, Y. Honda, O. Kitao, H. Nakai, M. Klene, X. Li, J. E. Knox, H. P. Hratchian, J. B. Cross, C. Adamo, J. Jaramillo, R. Gomperts, R. E. Stratmann, O. Yazyev, A. J. Austin, R. Cammi, C. Pomelli, J. W. Ochterski, P. Y. Ayala, K. Morokuma, G. A. Voth, P. Salvador, J. J. Dannenberg, V. G. Zakrzewski, S. Dapprich, A. D. Daniels, M. C. Strain, O. Farkas, D. K. Malick, A. D. Rabuck, K. Raghavachari, J. B. Foresman, J. V. Ortiz, Q. Cui, A. G. Baboul, S. Clifford, J. Cioslowski, B. B. Stefanov, G. Liu, A. Liashenko, P. Piskorz, I. Komaromi, R. L. Martin, D. J. Fox, T. Keith, M. A. Al-Laham, C. Y. Peng, A. Nanayakkara, M. Challacombe, P. M. W. Gill, B. Johnson, W. Chen, M. W. Wong, C. Gonzalez, and J. A. Pople, Gaussian, Inc., Pittsburgh PA, 2003. [↑](#footnote-ref-6)
6. - W. J. Hehre, R. Ditchfield, and J. A. Pople, *J. Chem. Phys.* **56**, 2257 (1972).

   P. C. Hariharan and J. A. Pople, *Theo. Chim. Acta* **28**, 213 (1973). [↑](#footnote-ref-7)
7. [↑](#endnote-ref-2)
8. -W. Kohn, A. D. Becke and R.G. Parr, *J. Phys. Chem.*, **1996**, *100*, 12974. [↑](#footnote-ref-8)
9. - A.D. Becke, Phys. Rev. A, **1988**, *38*, 3098. [↑](#footnote-ref-9)
10. - A. D. McLean and G. S. Chandler, J. Chem. Phys., **1980**, *72*, 5639. [↑](#footnote-ref-10)
11. -R. Krishnan, J. S. Binkley, R. Seeger and J. A. Pople, J. Chem. Phys., **1980**, *72*, 650. [↑](#footnote-ref-11)
